# Supplementary material
Source: PubMed Central journal article supplement (PMC7718425)
Supplement: NIHMS1596286-supplement-SuppInfo.pdf [file NIHMS1596286-supplement-SuppInfo.pdf]

# Supplementary Information for

## Cell-free biosensors for rapid detection of water contaminants

Jaeyoung K. Jung,<sup>1,2,3,\*</sup> Khalid K. Alam,<sup>1,2,3\*</sup> Matthew S. Verosloff,<sup>2,3,4</sup> Daiana A. Capdevila,<sup>5</sup> Morgane Desmau,<sup>6</sup> Phillip R. Clauer,<sup>7</sup> Jeong Wook Lee,<sup>8</sup> Peter Q. Nguyen,<sup>9</sup> Pablo A. Pastén,<sup>10,11</sup> Sandrine J. Matiasek,<sup>12,13</sup> Jean-François Gaillard,<sup>6</sup> David P. Giedroc,<sup>5,14</sup> James J. Collins<sup>7,9,15,16,17</sup> and Julius B. Lucks<sup>1,2,3,4,%</sup>

1 – Department of Chemical and Biological Engineering, Northwestern University (Evanston IL, USA)

2 – Center for Synthetic Biology, Northwestern University (Evanston, IL, USA)

3 – Center for Water Research, Northwestern University (Evanston, IL, USA)

4 – Interdisciplinary Biological Sciences Graduate Program, Northwestern University (Evanston, IL, USA)

5 – Department of Chemistry, Indiana University, (Bloomington, IN, USA)

6 – Department of Civil and Environmental Engineering, Northwestern University (Evanston, IL, USA)

7 – Department of Biological Engineering, Massachusetts Institute of Technology (Cambridge, MA, USA)

8 – Department of Chemical Engineering, Pohang University of Science and Technology (Pohang, Republic of Korea)

9 – Wyss Institute for Biologically Inspired Engineering, Harvard University (Boston, MA, USA)

10 – Departamento de Ingeniería Hidráulica y Ambiental, Pontificia Universidad Católica de Chile (Santiago, Chile)

11 – Centro de Desarrollo Urbano Sustentable (CEDEUS) (Santiago, Chile)

12 – Department of Geological and Environmental Sciences, California State University, Chico (Chico, CA, USA)

13 – Center for Water and the Environment, California State University, Chico (Chico, CA, USA)

14 – Department of Molecular and Cellular Biochemistry, Indiana University, (Bloomington, IN, USA)

15 – Institute for Medical Engineering & Science, Massachusetts Institute of Technology (Cambridge, MA, USA)

16 – Synthetic Biology Center, Massachusetts Institute of Technology (Cambridge, MA, USA)

17 – Broad Institute of MIT and Harvard (Cambridge, MA, USA)

\*These authors contributed equally

% correspondence: [jblucks@northwestern.edu](mailto:jblucks@northwestern.edu)

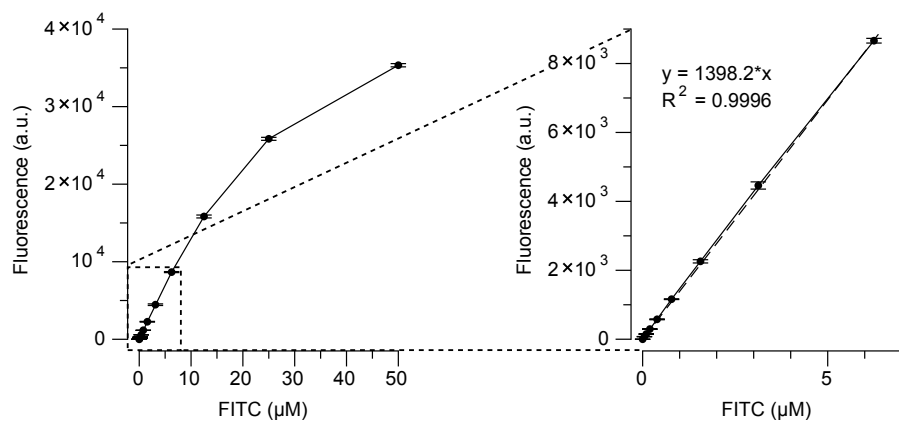

**Supplementary Fig. 1 | Micromolar Equivalent Fluorescein (MEF) standardization.** Arbitrary units of fluorescence were standardized to  $\mu\text{M}$  concentrations of fluorescein (FITC) using a NIST traceable standard (see Methods). In the representative example shown here, a dilution series of FITC was prepared in buffer (100 mM sodium borate, pH 9.5) and measured on a plate reader using the same settings for measuring 3WJdB signal (472 nm excitation, 507 nm emission). The resulting curve, calculated over the linear range 0–6.25  $\mu\text{M}$ , was then used to standardize fluorescence measured from ROSALIND reactions. The standard curve was generated at regular intervals for each plate reader and each measurement setting. Data shown are for  $n=9$  replicates (3 experimentally independent replicates each with 3 technical replicates). Error bars indicate standard deviation computed over  $n=9$  replicates.

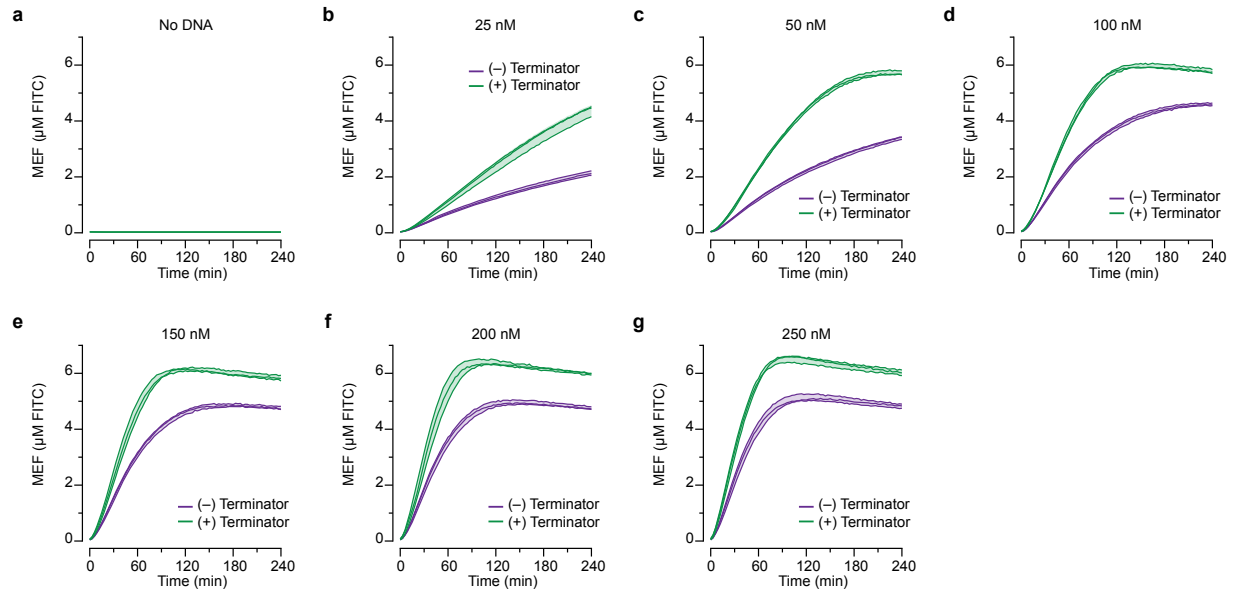

**Supplementary Fig. 2 | Fluorescence-activation of 3WJdB during run-off *in vitro* transcription reactions is improved by additionally encoding a T7 terminator.** *In vitro* transcription reactions using a commercially available kit (NEB HiScribe™ T7 Quick High Yield RNA Synthesis Kit) were performed across a range of DNA template concentrations, with and without an additional T7 terminator sequence. **a**, Reactions containing no DNA failed to generate signal, while all other DNA containing reactions (**b-g**) generated measurable fluorescence that improved with the addition of a template-encoded T7 terminator. We hypothesize that this terminator-dependent increase in fluorescence could be due to the terminator structure encouraging faster recycling of T7 RNAP from the elongation phase, to the termination phase, and then to initiation phase. Although less likely due to the highly structured design of 3WJdB, the terminator-dependent increase could be due to the terminator structure stabilizing the productive, fluorescence-activating fold of 3WJdB. All data shown for  $n=3$  independent biological replicates as lines with raw fluorescence values standardized to  $\mu\text{M FITC}$ . Shading indicates the average value of 3 independent biological replicates  $\pm$  standard deviation.

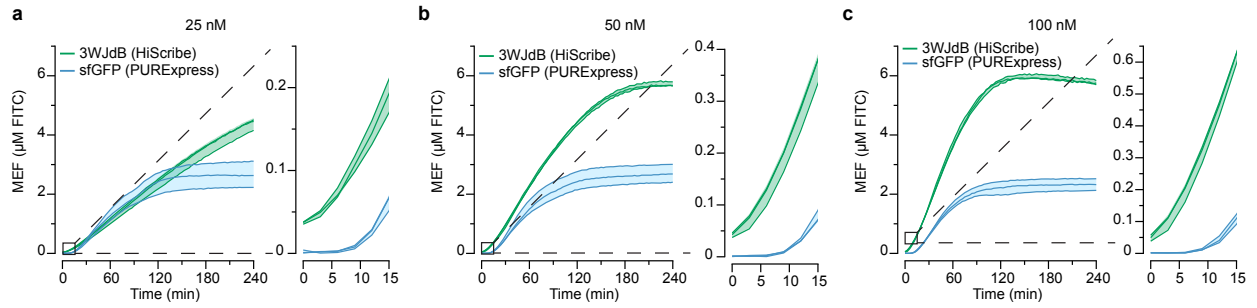

**Supplementary Fig. 3 | Fluorescence-activation from 3WJdB transcription reactions is faster and brighter than fluorescence from transcription-translation (PURE) reactions of sfGFP.** All data shown for n=3 independent biological replicates as lines with raw fluorescence values standardized to  $\mu\text{M}$  FITC. Shading indicates the average value of 3 independent biological replicates  $\pm$  standard deviation.

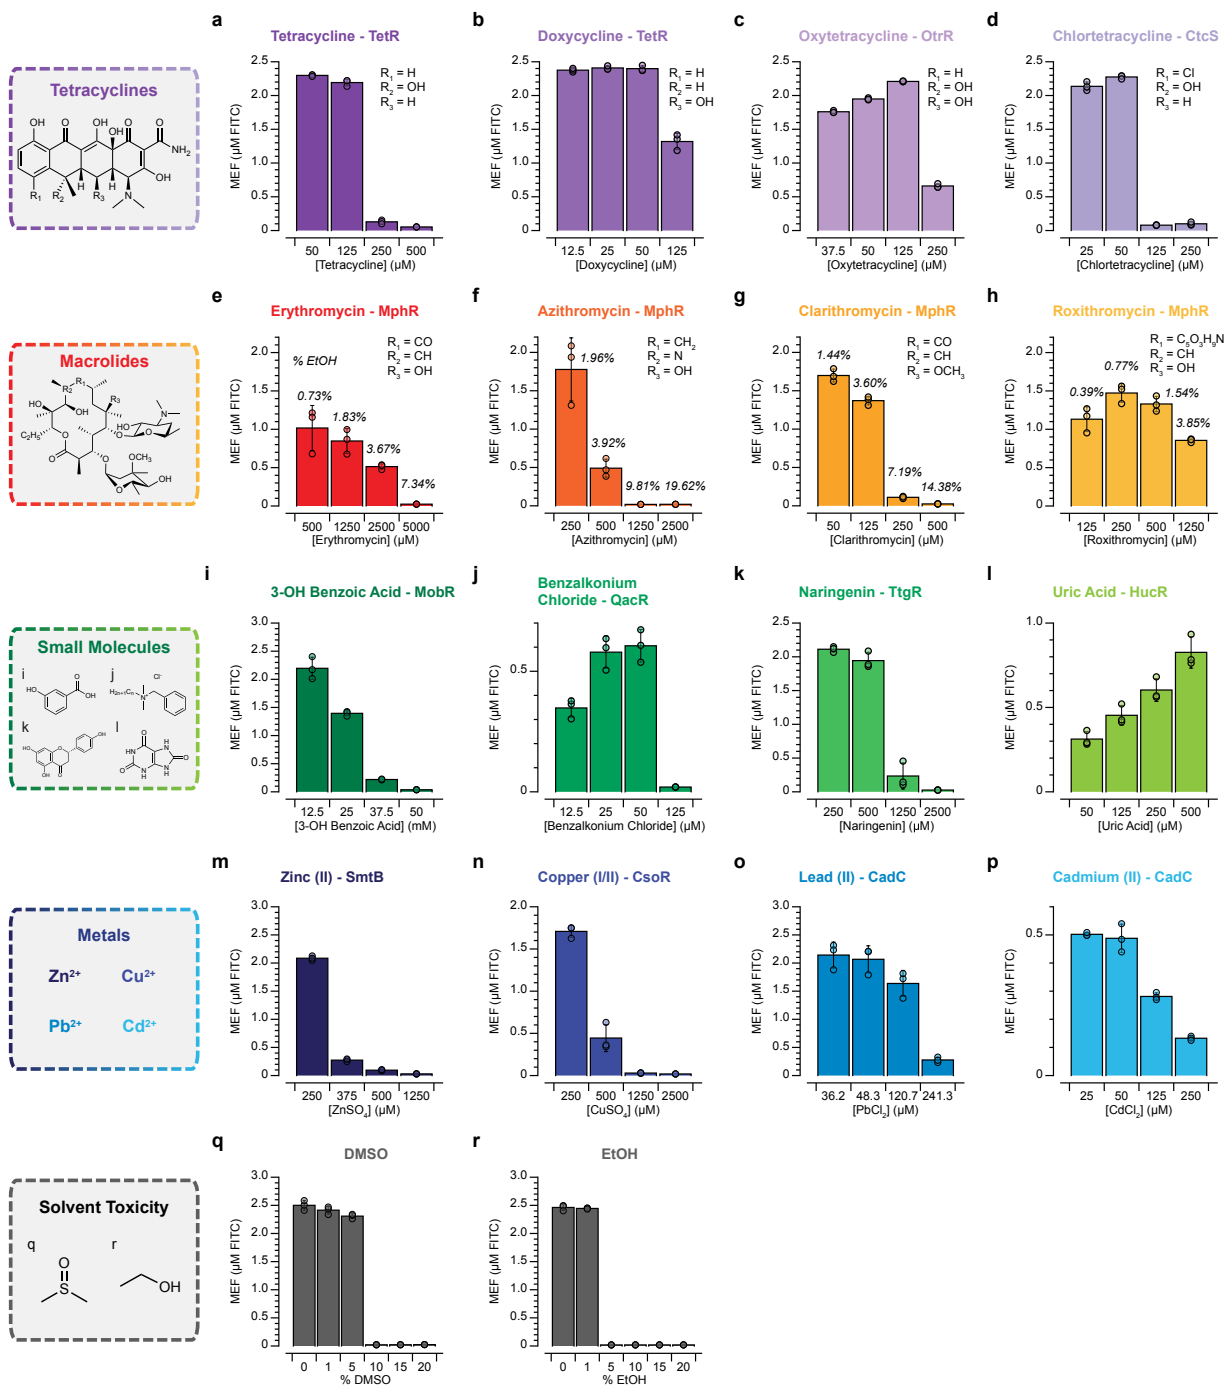

**Supplementary Fig. 4 | Ligand and solvent inhibitory effects in ROSALIND.** a – d, Tetracycline sensors can tolerate up to hundreds of micromolar of tetracyclines. e – h, Varying amounts of different macrolides are tolerated by ROSALIND, and the inhibitory effects of macrolides appears to be caused by the solvent in which the ligand is dissolved. %EtOH indicated above each bar. ROSALIND reactions are poisoned at the tens of millimolar range of 3-hydroxy benzoic acid i, at the hundreds of micromolar range of benzalkonium chloride j, and at a low millimolar range of naringenin k. l, No inhibitory effect of uric acid is observed at its maximum solubility limit. m – p, Inhibitory effects of metals vary. q, r, There are appreciable inhibitory effects due to the solvents DMSO and EtOH used to dissolve several of the ligands. All data shown for

n=3 independent biological replicates as points with raw fluorescence values standardized to  $\mu\text{M}$  FITC, and bars representing averages of the replicates. Error bars indicate the average value of 3 independent biological replicates  $\pm$  standard deviation.

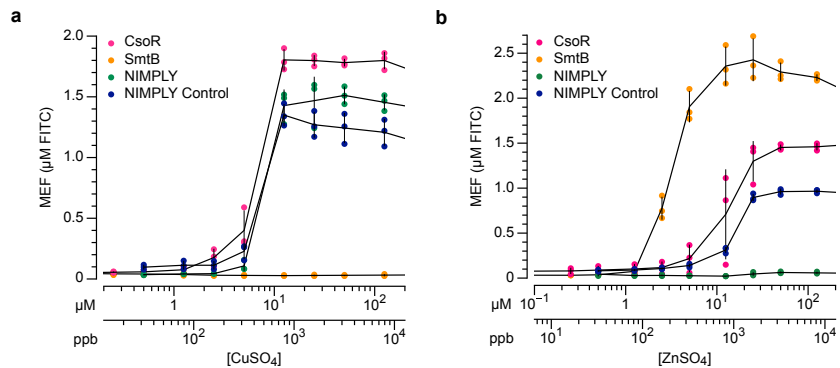

**Supplementary Fig. 5 | Copper and Zinc dose response curves of NIMPLY circuits.** The Cu NIMPLY Zn circuit, a control NIMPLY circuit where the KB2-encoding sequence was replaced by the reverse sequence and CsoR- or SmtB-regulated reactions were each tested and found to function as expected for a range of **a**,  $\text{CuSO}_4$  and **b**,  $\text{ZnSO}_4$  concentrations. All data shown for  $n=3$  independent biological replicates as points with raw fluorescence values standardized to MEF ( $\mu\text{M}$  FITC). Error bars indicate the average value of 3 independent biological replicates  $\pm$  standard deviation. Reactions are configured as described in **Fig. 4c**.

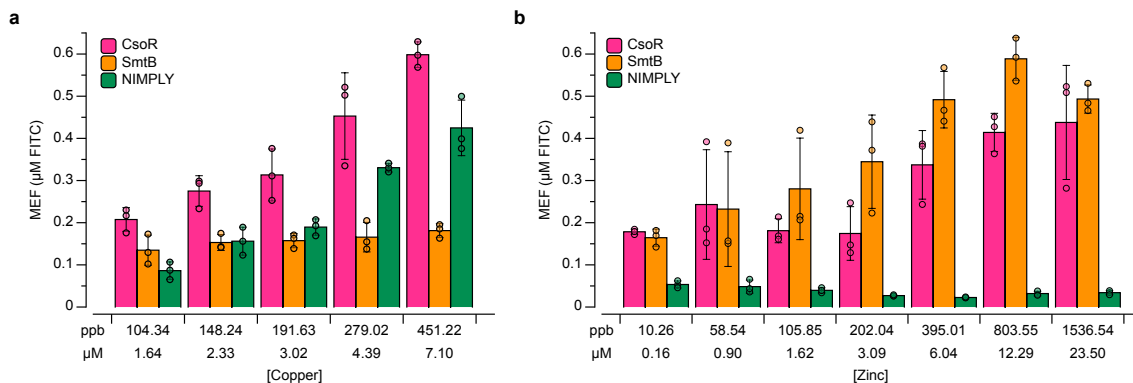

**Supplementary Fig. 6 | ROSALIND reactions can be freeze-dried and rehydrated with a drinking water source.** The ROSALIND reactions described in Fig. 6 were constructed, freeze-dried and rehydrated with a municipal water sample from Evanston, Illinois that was filtered and spiked with a range of concentrations of **a**, CuSO<sub>4</sub> and **b**, ZnSO<sub>4</sub>. The reactions were then incubated and characterized for fluorescence by plate reader. X-axis concentrations were obtained from FAAS analysis of these same samples. In each case, the reactions behaved as expected. All data shown for n=3 independent biological replicates as points with raw fluorescence values standardized to MEF (µM FITC), and bars representing averages of the replicates. Error bars indicate the average value of 3 independent biological replicates ± standard deviation. Reactions are configured as described in Fig. 4c.



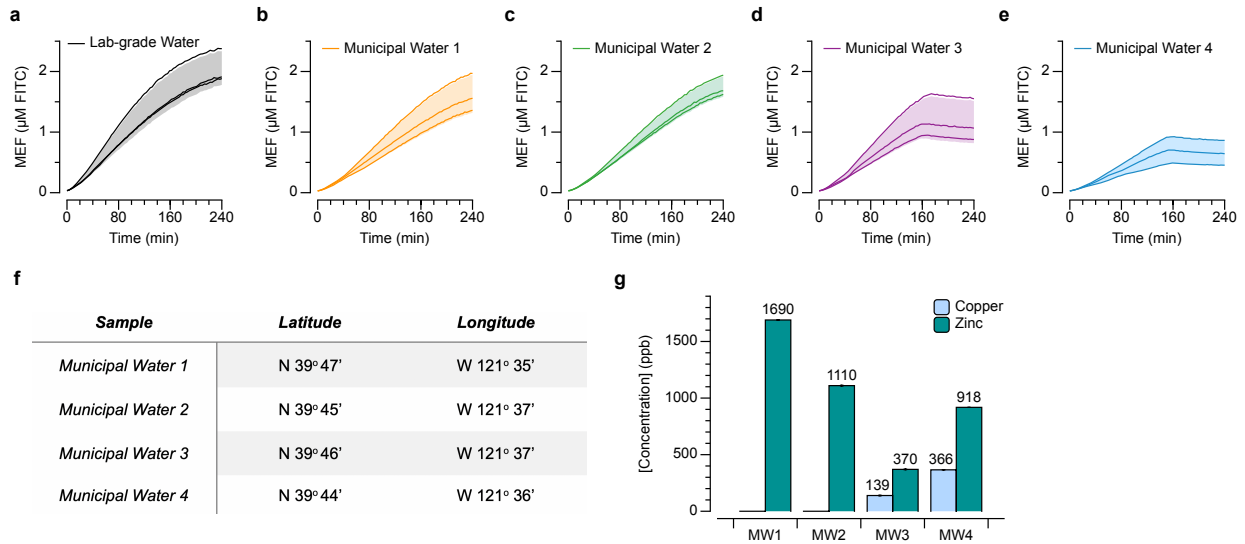

**Supplementary Fig. 7 | Paradise Municipal Water Sample Analysis.** **a – e**, Unregulated ROSALIND reactions with 25 nM of 3WJdB template were freeze-dried and rehydrated with Paradise municipal water samples used in **Fig. 6c-f** to investigate matrix effects. While little toxicity effects are observed from the samples with zinc only (**b, c**), the samples with copper and zinc (**d, e**) seem to inhibit signal from 3WJdB, and the sample with higher copper concentration (municipal water 4) is more heavily affected. All data shown for n=3 independent biological replicates as lines with raw fluorescence values standardized to MEF ( $\mu\text{M FITC}$ ). Shading indicates the average value of 3 independent biological replicates  $\pm$  standard deviation. **f**, GPS coordinates of the water samples. GPS coordinates are reported to the nearest minute resolution and thus represent regions rather than exact locations. **g**, FAAS measurements of the undiluted filtered water samples used in **Fig. 6c-f**. Bars represent the average values of n=3 independent replicates with  $\pm$  standard deviation.

**Supplementary Table 1 | US EPA, EU Drinking Water Directive and WHO Guidelines for ROSALIND Ligands in Drinking Water.** A dash indicates no regulatory guidelines are currently available.

| Contaminant                    | Environmental Protection Agency (US)      | Drinking Water Directive (EU) | WHO Guideline |
|--------------------------------|-------------------------------------------|-------------------------------|---------------|
| Tetracyclines                  | –                                         | –                             | –             |
| Macrolides (i.e. Erythromycin) | Candidate Contaminant List 4 <sup>a</sup> | –                             | –             |
| 3-OH Benzoic Acid              | –                                         | –                             | –             |
| Benzalkonium chloride          | –                                         | –                             | –             |
| Naringenin                     | –                                         | –                             | –             |
| Uric Acid                      | –                                         | –                             | –             |
| Zinc                           | 5 mg/L <sup>b</sup>                       | 3 mg/L                        | –             |
| Copper                         | 1.3 mg/L (1 mg/L <sup>b</sup> )           | 2 mg/L                        | 2 mg/L        |
| Lead                           | 15 µg/L                                   | 10 µg/L                       | 10 µg/L       |
| Cadmium                        | 5 µg/L                                    | 5 µg/L                        | 3 µg/L        |

<sup>a</sup>Candidate contaminants are under consideration for regulation.

<sup>b</sup>National secondary drinking water regulation (unenforced)

**Supplementary Table 2 | Concentrations of ROSALIND components in each sensor.**

| Ligand – aTF Pair            | [DNA] (nM) | [aTF] (μM) | [Ligand] (μM) | Ligand Solvent               | [Ligand Stock] (μM) | Ligand Purchased From                  |
|------------------------------|------------|------------|---------------|------------------------------|---------------------|----------------------------------------|
| Anhydrotetracycline – TetR   | 25         | 1.25       | 0.1 – 50      | Ethanol                      | 5 – 500             | Sigma-Aldrich<br>(Cat#: 37919–100MG–R) |
| Tetracycline – TetR          | 25         | 1.25       | 0.05 – 500    | Lab-grade H <sub>2</sub> O   | 24 – 14,383         | Gold Biotechnology<br>(Cat#: T–101–25) |
| Doxycycline – TetR           | 25         | 1.25       | 0.05 – 125    | Lab-grade H <sub>2</sub> O   | 8 – 800             | Gold Biotechnology<br>(Cat#: D–500–1)  |
| Oxytetracycline – OtrR       | 25         | 2.5        | 0.25 – 250    | Lab-grade H <sub>2</sub> O   | 14.5 – 1,450        | Gold Biotechnology<br>(Cat#: O–410–10) |
| Chlortetracycline – CtcS     | 25         | 1.25       | 0.125 – 125   | Lab-grade H <sub>2</sub> O   | 5.4 – 5,400         | Gold Biotechnology<br>(Cat#: C–840–5)  |
| Erythromycin – MphR          | 25         | 0.625      | 0.05 – 5,000  | Ethanol                      | 6.8 – 6,800         | Sigma-Aldrich<br>(Cat#: E5389–1G)      |
| Azithromycin – MphR          | 25         | 0.625      | 0.125 – 2,500 | Ethanol                      | 12.7 – 12,700       | Sigma-Aldrich<br>(Cat#: PHR1088–1G)    |
| Clarithromycin – MphR        | 25         | 0.625      | 0.25 – 500    | Ethanol                      | 3.5 – 3,500         | Sigma-Aldrich<br>(Cat#: PHR1038–500MG) |
| Roxithromycin – MphR         | 25         | 0.625      | 0.5 – 1,250   | Ethanol                      | 32.4 – 32,400       | Sigma-Aldrich<br>(Cat#: R4393–1G)      |
| 3-OH Benzoic Acid – MobR     | 10         | 100        | 5 – 50,000    | 1M Tris-base<br>Buffer, pH 8 | 109.6 – 225,410     | Sigma-Aldrich<br>(Cat#: H20008–5G)     |
| Benzalkonium Chloride – QacR | 25         | 2.5        | 0.5 – 125     | Lab-grade H <sub>2</sub> O   | 41.33 – 4,133       | Sigma-Aldrich<br>(Cat#: 12060–100G)    |
| Naringenin – TtgR            | 10         | 12.5       | 0.5 – 2,500   | DMSO                         | 73.5 – 36,731       | Sigma-Aldrich<br>(Cat#: N5893 – 1G)    |
| Uric Acid – HucR             | 17.5       | 2.15       | 2.5 – 500     | 1mM NaOH                     | 77 – 770            | Sigma-Aldrich<br>(Cat#: U0881–10G)     |
| ZnSO <sub>4</sub> – AdcR     | 7.5        | 1.5        | 30            | Lab-grade H <sub>2</sub> O   | 200                 | Sigma-Aldrich<br>(Cat#: 83265–250mL–F) |
| ZnSO <sub>4</sub> – SmtB     | 25         | 5          | 0.05 – 1,250  | Lab-grade H <sub>2</sub> O   | 2 – 2,000           | Sigma-Aldrich<br>(Cat#: 83265–250mL–F) |
| CuSO <sub>4</sub> – CsoR     | 25         | 2.5*       | 0.05 – 2,500  | Lab-grade H <sub>2</sub> O   | 2.7 – 24,430        | Sigma-Aldrich<br>(Cat#: 209198–5G)     |
| PbCl <sub>2</sub> – CadC     | 25         | 1.5        | 0.005 – 241.3 | Lab-grade H <sub>2</sub> O   | 0.2 – 200           | Sigma-Aldrich<br>(Cat#: 203572–10G)    |
| CdCl <sub>2</sub> – CadC     | 25         | 1.5        | 0.05 – 250    | Lab-grade H <sub>2</sub> O   | 5.2 – 5,200         | Sigma-Aldrich<br>(Cat#: 202908–10G)    |

\*All aTF concentrations listed are dimer concentrations except for CsoR, which is a tetramer.

**Supplementary Table 3 | Estimated cost per ROSALIND reaction\***

| Component                 | Supplier | Catalog Number | Quantity   | Price (USD) | [Stock]              | Stock Volume (mL) | Amount / Reaction (mL) | # Reactions | Cost / 20 $\mu$ L Reaction (USD) |
|---------------------------|----------|----------------|------------|-------------|----------------------|-------------------|------------------------|-------------|----------------------------------|
| DFHBI-1T                  | Tocris   | 5610           | 10 mg      | \$240.59    | 40 mM                | 0.781             | 0.00113                | 691         | \$0.35                           |
| ATP                       | Sigma    | A2383-25G      | 25 g       | \$466.48    | 100 mM               | 453.605           | 0.00057                | 795798      | < \$0.01                         |
| CTP                       | Sigma    | C1506-1G       | 1 g        | \$448.84    | 100 mM               | 18.971            | 0.00057                | 33282       | \$0.01                           |
| GTP                       | Sigma    | G8877-1G       | 1 g        | \$600.74    | 100 mM               | 19.114            | 0.00057                | 33533       | \$0.02                           |
| UTP                       | Sigma    | U6625-1G       | 1 g        | \$495.88    | 100 mM               | 18.179            | 0.00057                | 31893       | \$0.01                           |
| Tris                      | Sigma    | RDD009-2.5KG   | 2.5 kg     | \$166.56    | 2 M                  | 7931.5            | 0.00020                | 39657500    | << \$0.01                        |
| MgCl <sub>2</sub>         | Sigma    | M2670-1KG      | 1 kg       | \$109.81    | 800 mM               | 6148.5            | 0.00020                | 30742500    | << \$0.01                        |
| Spermidine                | Sigma    | S2626-25G      | 25 g       | \$498.82    | 200 mM               | 860.585           | 0.00020                | 4302926     | << \$0.01                        |
| NaCl                      | Sigma    | 746398-25KG    | 25 kg      | \$198.50    | 2 M                  | 213894.6          | 0.00020                | 1069473000  | << \$0.01                        |
| DTT                       | Gold Bio | DTT500         | 500 g      | \$1,425     | 1 M                  | 3241.5            | 0.00020                | 16207500    | << \$0.01                        |
| Sucrose                   | Sigma    | S0389-5KG      | 5 kg       | \$61.53     | 5 M                  | 2921.4            | 0.00020                | 14607000    | << \$0.01                        |
| Mannitol                  | Sigma    | M4125-5KG      | 5 kg       | \$173.01    | 1 M                  | 27446.9           | 0.00500                | 5489380     | << \$0.01                        |
| TIPP                      | NEB      | M0296L         | 1250 U     | \$244.79    | 2 U/ $\mu$ L         | 0.625             | 0.00015                | 4167        | \$0.06                           |
| T7 RNAP <sup>a</sup>      | n/a      | n/a            | 50 mg      | \$400.00    | 1 mg/mL              | 50                | 0.0002                 | 250000      | < \$0.01                         |
| aTF <sup>a</sup>          | n/a      | n/a            | 10 mg      | \$400.00    | 1 mg/mL              | 10                | 0.0002                 | 50000       | < \$0.01                         |
| DNA Template <sup>b</sup> | n/a      | n/a            | 20 $\mu$ g | \$42.81     | 0.1 $\mu$ g/ $\mu$ L | 0.2               | 0.001                  | 200         | \$0.21                           |
| <b>TOTAL</b>              |          |                |            |             |                      |                   |                        |             | <b>~ \$0.67 / reaction</b>       |

<sup>a</sup>Homemade, estimated for 2 L expression culture using core facility pricing (NU rPPC, March 2019).

<sup>b</sup>Calculated for the cost of a 2 mL PCR and purification using NEB #M3050 (\$34.96/prep), NEB #N0447L (\$2.45/prep), Qiagen #28106 (\$4.40/prep), and PCR primers (< \$1/prep).

\*Calculated using institutional pricing (March 2019). Not included in calculation: labor, overhead, equipment, consumables (e.g. pipette tips) and additional materials (e.g. for pH adjustments), laboratory grade water, storage, shipping.

**Supplementary Table 4 | Comparison between traditional laboratory-based methods for assessing water contaminants and synthetic biology approaches.** Techniques are assessed by documented sensitivity, specificity, portability for the field, the types of protocol steps needed to perform the tests and sample volume/equipment needs. Sections are divided based on metal detection and antibiotic detection.

|                                                                          | <b>Sensitivity<br/>(Detection Limit / Range)</b> |                 |                |                | <b>Specificity</b>           | <b>Port-<br/>ability</b> | <b>Protocol Steps</b>                              | <b>Sample Volume –<br/>Equipment Needs</b>                                    |
|--------------------------------------------------------------------------|--------------------------------------------------|-----------------|----------------|----------------|------------------------------|--------------------------|----------------------------------------------------|-------------------------------------------------------------------------------|
| <b>Metals: Zn, Cu, Pb, Cd</b>                                            |                                                  |                 |                |                |                              |                          |                                                    |                                                                               |
| <b>Atomic Spectroscopy</b>                                               | <b>Zn</b>                                        | <b>Cu</b>       | <b>Pb</b>      | <b>Cd</b>      |                              |                          |                                                    |                                                                               |
| <i>Flame Atomic Absorption (FAAS)<sup>1</sup></i>                        | 15 nM                                            | 50 nM           | 50 nM          | 14 nM          | Total dissolved element      | No                       | Sample Filtration (SF), Acidification, Calibration | Chemical Laboratory Infrastructure and Instrumentation                        |
| <i>Inductively Coupled Plasma – Optical Emission<sup>1</sup></i>         | 1 nM                                             | 5 nM            | 5 nM           | 1 nM           | Total dissolved element      | No                       | SF, Acidification, Calibration                     | Chemical Laboratory Infrastructure and Instrumentation                        |
| <i>Graphite Furnace AAS (GFAAS)<sup>1</sup></i>                          | 115 pM                                           | 1 nM            | 0.2 nM         | 0.2 nM         | Total dissolved element      | No                       | SF, Acidification, Calibration                     | Chemical Laboratory Infrastructure and Instrumentation                        |
| <i>Inductively Coupled Plasma Mass Spectrometry (ICP-MS)<sup>1</sup></i> | 15 pM                                            | 8 pM            | 0.5 pM         | 1 pM           | Total dissolved element      | No                       | SF, Acidification, Calibration                     | Chemical Laboratory Infrastructure and Instrumentation                        |
| <b>Electrochemistry</b>                                                  |                                                  |                 |                |                |                              |                          |                                                    |                                                                               |
| <i>Potentiometry<sup>2</sup></i>                                         | –                                                | 10 nM – 0.1 M   | 1 µM – 0.1 M   | 100 nM – 0.1 M | Free metal ion activity      | Yes                      | SF, Ionic Strength Buffer                          | High impedance entry voltmeter / pH meter                                     |
| <i>Voltammetry<sup>3, 4</sup></i>                                        | 1 nM                                             | 1 nM            | 1 nM           | 1 nM           | Electro-labile concentration | No                       | SF, Background electrolyte, Buffer                 | Potentiostat, Electrochemical Cell, N <sub>2</sub> for purging O <sub>2</sub> |
| <i>Voltammetry<sup>3-5</sup></i>                                         | 150 nM – 1.5 µM                                  | 160 nM – 1.6 µM | 10 nM – 0.5 µM | 10 nM – 1 µM   | Electro-labile concentration | Yes                      | SF, Background electrolyte, Buffer                 | Portable Potentiostat, Screen printed electrodes                              |
| <b>Molecular Spectroscopy</b>                                            |                                                  |                 |                |                |                              |                          |                                                    |                                                                               |
| <i>Colorimetry<sup>3</sup></i>                                           | 160 nM – 1.6 µM                                  | 1.6 µM – 13 µM  | 0.5 µM – 10 µM | 200 nM – 3 µM  | Interferences                | Yes                      | SF, adding colorimetric reagent                    | Portable Spectrophotometer                                                    |
| <b>Synthetic Biology</b>                                                 |                                                  |                 |                |                |                              |                          |                                                    |                                                                               |

|                                                      |                                            |                         |                                                 |                            |                            |      |                                                    |                                                                               |
|------------------------------------------------------|--------------------------------------------|-------------------------|-------------------------------------------------|----------------------------|----------------------------|------|----------------------------------------------------|-------------------------------------------------------------------------------|
| <i>Whole Cell Biosensors (WCBs)</i> <sup>6-9</sup>   | 0.5 $\mu$ M - 4.5 mM                       | 1.5 $\mu$ M - 2 mM      | 15 nM - 1.5 mM                                  | 5 nM - 27 $\mu$ M          | Known Crosstalk            | No   | SF, C source / O <sub>2</sub> / Metabolic Activity | ~ 1 mL, cell growth, for detection: bioluminescence, fluorescence             |
| <i>Whole Cell Biosensors (WCBs)</i> <sup>10</sup>    | -                                          | -                       | -                                               | -                          | Known crosstalk            | Yes* | SF, C source                                       | Portable luminometer                                                          |
| <i>ROSALIND</i>                                      | 2.5 $\mu$ M - 375 $\mu$ M                  | 5 $\mu$ M - 500 $\mu$ M | 1.25 $\mu$ M - 250 $\mu$ M                      | 1.25 $\mu$ M - 250 $\mu$ M | Circuits can fix crosstalk | Yes  | SF                                                 | 20 $\mu$ L, Illuminator                                                       |
| <b>Antibiotics: Tetracyclines, Macrolides</b>        |                                            |                         |                                                 |                            |                            |      |                                                    |                                                                               |
| <b>Separation Methods</b>                            | <b>Tetracyclines</b>                       |                         | <b>Macrolides</b>                               |                            |                            |      |                                                    |                                                                               |
| <i>LC/MS/MS - QTRAP - MS/MS</i> <sup>11-13</sup>     | 0.2 nM - 2.0 nM                            |                         | 0.3 nM - 1.5 nM                                 |                            | -                          | No   | Solid Phase Extraction (SPE)                       | Chemical Laboratory Infrastructure and Instrumentation                        |
| <b>Electrochemistry</b>                              |                                            |                         |                                                 |                            |                            |      |                                                    |                                                                               |
| <i>Voltammetry</i> <sup>14</sup>                     | ~ 1 nM                                     |                         | -                                               |                            | Unknown                    | No   | Adsorptive stripping                               | Potentiostat, Electrochemical Cell, N <sub>2</sub> for purging O <sub>2</sub> |
| <i>Voltammetry</i> <sup>15</sup>                     | -                                          |                         | ~ 2 $\mu$ M                                     |                            | Unknown                    | No   | Differential Pulse Polarography                    | Potentiostat, Electrochemical Cell, N <sub>2</sub> for purging O <sub>2</sub> |
| <b>Synthetic Biology</b>                             |                                            |                         |                                                 |                            |                            |      |                                                    |                                                                               |
| <i>Whole Cell Biosensors (WCBs)</i> <sup>9, 16</sup> | ~45 nM                                     |                         | ~10 $\mu$ M                                     |                            | Known Crosstalk            | Yes  | SF, Optional Pre-concentration                     | Varies: Cell encapsulation, growth, biocontainment, detection                 |
| <i>ROSALIND</i>                                      | ~125 nM (Circuits can enhance sensitivity) |                         | ~2.5 $\mu$ M (Circuits can enhance sensitivity) |                            | Known Crosstalk            | Yes  | SF, Optional Pre-concentration                     | 20 $\mu$ L, Illuminator                                                       |

\*Field deployment shown for As only.

**Supplementary Table 5 | Plasmid constructs and purification methods of aTFs.**

| aTF  | Type of Purification                                                                                                      | Tag Location                         | TEV Cleavage | Columns Used                                                                                                |
|------|---------------------------------------------------------------------------------------------------------------------------|--------------------------------------|--------------|-------------------------------------------------------------------------------------------------------------|
| TetR | His-tag affinity followed by size exclusion                                                                               | C-terminus 6XHis-tag                 | N/A          | HisTrap FF 5mL column for affinity, and Superdex HiLoad 26/600 200 pg column for size exclusion             |
| OtrR | His-tag affinity followed by size exclusion                                                                               | C-terminus TEV followed by 6XHis-tag | No           | HisTrap FF 5mL column for affinity, and Superdex HiLoad 26/600 200 pg column for size exclusion             |
| CtcR | His-tag affinity followed by size exclusion                                                                               | C-terminus 6XHis-tag                 | N/A          | HisTrap FF 5mL column for affinity, and Superdex HiLoad 26/600 200 pg column for size exclusion             |
| MphR | His-tag affinity followed by size exclusion                                                                               | C-terminus 6XHis-tag                 | N/A          | HisTrap FF 5mL column for affinity, and Superdex HiLoad 26/600 200 pg column for size exclusion             |
| MobR | His-tag affinity followed by size exclusion                                                                               | C-terminus TEV followed by 6XHis-tag | No           | HisTrap FF 5mL column for affinity, and Superdex HiLoad 26/600 200 pg column for size exclusion             |
| QacR | His-tag affinity                                                                                                          | C-terminus 6XHis-tag                 | N/A          | Gravity flow column packed with Qiagen Ni-NTA Agarose                                                       |
| TtgR | His-tag affinity followed by size exclusion                                                                               | C-terminus 6XHis-tag                 | No           | HisTrap FF 5mL column for affinity, and Superdex HiLoad 26/600 200 pg column for size exclusion             |
| HucR | His-tag affinity                                                                                                          | N-terminus 6XHis-tag                 | No           | Gravity flow column packed with Qiagen Ni-NTA Agarose                                                       |
| AdcR | PEI precipitation, (NH <sub>4</sub> ) <sub>2</sub> SO <sub>4</sub> precipitation, ion exchange followed by size exclusion | N/A                                  | N/A          | SP-Sepharose fast flow column for ion exchange, and Superdex 75 preparative-grade column for size exclusion |
| SmtB | His-tag affinity                                                                                                          | C-terminus TEV followed by 6XHis-tag | No           | Gravity flow column packed with Qiagen Ni-NTA Agarose                                                       |
| CsoR | PEI precipitation, (NH <sub>4</sub> ) <sub>2</sub> SO <sub>4</sub> precipitation, ion exchange followed by size exclusion | N/A                                  | N/A          | SP-Sepharose fast flow column for ion exchange, and Superdex 75 preparative-grade column for size exclusion |

|                                    |                                                                                                                                 |                                         |     |                                                                                                                    |
|------------------------------------|---------------------------------------------------------------------------------------------------------------------------------|-----------------------------------------|-----|--------------------------------------------------------------------------------------------------------------------|
| CsoR<br>(Extended<br>Data Fig. 7a) | His-tag affinity                                                                                                                | N-terminus TEV<br>followed by 6XHis-tag | Yes | Gravity flow column packed<br>with Qiagen Ni-NTA Agarose                                                           |
| CadC                               | PEI precipitation, (NH <sub>4</sub> ) <sub>2</sub> SO <sub>4</sub><br>precipitation, ion exchange<br>followed by size exclusion | N/A                                     | N/A | SP-Sepharose fast flow column for ion<br>exchange, and Superdex 75 preparative-<br>grade column for size exclusion |



## REFERENCES

1. AAS, GFAAS, ICP or ICP-MS? Which technique should I use?, in *An elementary overview of elemental analysis*. 2001, Thermo Elemental: USA.
2. *Laboratory Products Catalog*, in *Water Analysis Instruments*, T.S. Orion, Editor. 2013, Thermo Scientific. p. 134.
3. *Water Quality Testing and Analytic Instruments*. 2019; Available from: <https://www.hach.com/>.
4. *Voltammetry and cyclic voltammetric stripping*. 2010 - 2019; Available from: <https://www.metrohm.com/en-us/products-overview/voltammetry/>.
5. *PalmSens4 potnetostat*. 2019; Available from: <https://www.palmsens.com/>.
6. Tauriainen, S., et al., *Luminescent bacterial sensor for cadmium and lead*. *Biosens Bioelectron*, 1998. **13**(9): p. 931-8.
7. Riether, K.B., M.A. Dollard, and P. Billard, *Assessment of heavy metal bioavailability using Escherichia coli zntAp::lux and copAp::lux-based biosensors*. *Appl Microbiol Biotechnol*, 2001. **57**(5-6): p. 712-6.
8. Bereza-Malcolm, L.T., G. Mann, and A.E. Franks, *Environmental sensing of heavy metals through whole cell microbial biosensors: a synthetic biology approach*. *ACS Synth Biol*, 2015. **4**(5): p. 535-46.
9. van der Meer, J.R. and S. Belkin, *Where microbiology meets microengineering: design and applications of reporter bacteria*. *Nature Reviews Microbiology*, 2010. **8**(7): p. 511-522.
10. Harms, H., *Biosensing of Heavy Metals*, in *Molecular Microbiology of Heavy Metals*, D.H. Nies and S. Silver, Editors. 2007, Springer Berlin Heidelberg: Berlin, Heidelberg. p. 143-157.
11. Snow, D.D., et al., *Tetracycline and Macrolide Antibiotics*, in *Liquid Chromatography/Mass Spectrometry, MS/MS and Time of Flight MS*. 2003, American Chemical Society. p. 161-174.
12. Valcarcel, Y., et al., *Detection of pharmaceutically active compounds in the rivers and tap water of the Madrid Region (Spain) and potential ecotoxicological risk*. *Chemosphere*, 2011. **84**(10): p. 1336-48.
13. Perez, R.A., et al., *Analysis of macrolide antibiotics in water by magnetic solid-phase extraction and liquid chromatography-tandem mass spectrometry*. *J Pharm Biomed Anal*, 2017. **146**: p. 79-85.
14. Joseph Wang, T.P., Meng Shan Lin, *Trace measurements of tetracyclines using adsorptive stripping voltammetry*. *Bioelectrochemistry and Bioenergetics*, 1986. **15**(2): p. 147-156.
15. Belal, F., et al., *Voltammetric determination of josamycin (a macrolide antibiotic) in dosage forms and spiked human urine*. *J Pharm Biomed Anal*, 2002. **30**(3): p. 705-13.
16. Koch, M., et al., *A dataset of small molecules triggering transcriptional and translational cellular responses*. *Data Brief*, 2018. **17**: p. 1374-1378.
